# Supplementary material
Source: ML conference proceedings conference paper supplement (https://aclanthology.org/2021.iwcs-1.18)
Supplement: Attachment [file ttt.pdf › iwcs-2021-supplementary/ulf-transition-parser/sbcl-deps/packages/ttt/doc/eacl2012/ttt.pdf]

# TTT: A tree transduction language for syntactic and semantic processing

**Adam Purtee**

University of Rochester  
Department of Computer Science  
apurtee@cs.rochester.edu

**Lenhart Schubert**

University of Rochester  
Department of Computer Science  
schubert@cs.rochester.edu

## Abstract

In this paper we present the tree to tree transduction language, TTT. We motivate the overall “template-to-template” approach to the design of the language, and outline its constructs, also providing some examples. We then show that TTT allows transparent formalization of rules for parse tree refinement and correction, logical form refinement and predicate disambiguation, inference, and verbalization of logical forms.

## 1 Introduction

Pattern matching and pattern-driven transformations of list-structured symbolic expressions or trees are fundamental tools in AI. They facilitate many symbol manipulation tasks, including operations on parse trees and logical forms, and even inference and aspects of dialogue and translation.

The TTT system allows concise and transparent specification of rules for such tasks, in particular (as we will show), parse tree refinement and correction, predicate disambiguation, logical form refinement, inference, and verbalization into English.

In parse tree refinement, our particular focus has been on repair of malformed parses of image captions, as obtained by the Charniak-Johnson parser (Charniak and Johnson, 2005). This has encompassed such tasks as distinguishing passive participles from past participles and temporal nominals from non-temporal ones, among other tasks which will be discussed later. For example, standard treebank parses tag both past participles (as in “has written”) and passive participles (as in “was written”) as VBN. This is undesir-

able for subsequent compositional interpretation, as the meanings of past and passive participles are distinct. We can easily relabel the past participles as VBEN by looking for parse tree subexpressions where a VBN is preceded by a form of “have”, either immediately or with an intervening adverb or adverbial, and replacing VBN by VBEN in such subexpressions. Of course this can be accomplished in a standard symbol manipulation language like Lisp, but the requisite multiple lines of code obscure the simple nature of the task. We have also been able to repair systematic PP (prepositional phrase) misattachments, at least in the limited domain of image captions. For example, a common error is attachment of a PP to the last conjunct of a conjunction, where instead the entire conjunction should be modified by the PP. Thus when a statistically obtained parse of the sentence “Tanya and Grandma Lillian at her highschool graduation party” brackets as “Tanya and (Grandma Lillian (at her highschool graduation party.))”, we want to lift the PP so that “at her highschool graduation party” modifies “Tanya and Grandma Lillian”.

Another systematic error is faulty classification of relative pronouns/determiners as wh-question pronouns/determiners, e.g., “the student *whose* mother contacted you” vs. “I know *whose* mother contacted you” – an important distinction in compositional semantics. (Note that only the first occurrence, i.e., the relative determiner, can be paraphrased as *with the property that his*, and only the second occurrence, in which *whose* forms a wh-nominal, can be paraphrased as *the person with the property that his*.) An important point here is that detecting the relative-determiner status of a wh-word like *whose* may require taking account

of an arbitrarily deep context. For example, in the phrase “the student in front of whose parents you are standing”, *whose* lies two levels of phrasal structure below the nominal it is semantically bound to. Such phenomena motivate the devices in TTT for detecting “vertical patterns” of arbitrary depth. Furthermore, we need to be able to make local changes “on the fly” in matching vertical patterns, because the full set of tree fragments flanking a vertical match cannot in general be saved using match variables. In the case of a *wh*-word that is to be re-tagged as a relative word, we need to rewrite it *at the point where the vertical pattern matches it*, rather than in a separate tree-(re)construction phase following the tree-matching phase.

An example of a discourse phenomenon that requires vertical matching is anaphoric referent determination. In particular, consider the well-known rule that a viable referent for an anaphoric pronoun is an NP that C-commands it, i.e., that is a (usually left) sibling of an ancestor of the pronoun. For example, in the sentence “John shows Lillian the snowman that he built”, the NP for *John* C-commands the pronominal NP for *he*, and thus is a viable referent for it (modulo gender and number agreement). We will later show a simple TTT rule that tags such an anaphoric pronoun with the indices of its C-commanding NP nodes, thus setting the stage for semantic interpretation.

We have also been able to perform Skolemization, conjunct separation, simple inference, and logical form verbalization with TTT and suspect its utility to logic tasks will increase as development continues.

The rest of the paper is organized as follows: we discuss related work in section 2, discuss the TTT language (including pattern matching and transduction syntax, and some theoretical properties) in section 3, and go through several detailed example applications in section 4.

A beta version of the system can be found at <http://www.cs.rochester.edu/research/ttt/>.

## 2 Related Work

There are several pattern matching and transduction facilities available; however, none proved sufficiently general and perspicuous to serve our various purposes. The Tiburon tool is a comprehensive system for manipulating regular tree grammars, tree automata, and tree transducers,

including weighted variants (May and Knight, 2008). It supports many useful algorithms, such as intersection, determinization, recognition, top-k generation, and maximum likelihood training. However, variables that appear in both a rule’s lhs and rhs must occur at a depth less than two on the left, and Tiburon cannot easily simulate our vertical path or sequence operators.

Timbuk is a system for deciding reachability with term rewriting systems and tree automata (Genet, 2003), and it also performs intersection, union, and determinization of tree automata. Though variables can appear at arbitrary locations in terms, they always match exactly one term from a fixed set, and therefore do not match sequences or vertical paths.

The three related tools Tgrep, Tregex, and Tsurgeon provide powerful tree matching and restructuring capabilities (Levy and Andrew, 2006). However, Tgrep and Tregex provide no transduction mechanism, and Tsurgeon’s modifications are limited to local transformations on trees. Also, it presupposes list structures that begin with an atom (as in Treebank trees, but not in parse trees with explicit phrasal features), and its patterns are fundamentally tree traversal patterns rather than tree templates, and can be quite hard to read.

Xpath and XSLT are languages for manipulation of XML trees (World Wide Web Consortium, 1999; World Wide Web Consortium, 1999). As its name indicates, Xpath expressions describe paths in trees to the relevant nodes, rather than patterns representing the trees to be matched, as in the TTT approach. It is useful for extracting structured but unordered information from trees, and supports numerous functions and predicates over matched nodes, but does not match ordered sequences. XSLT is also more procedurally oriented than TTT, and is useful for constructing XML representations of transformations of data extracted by Xpath. The primary advantages of TTT over Xpath and XSLT are a more concise syntax, ordered sequence matching, compositional patterns and templates, and in-place modification of trees.

Peter Norvig’s pattern matching language, “pat-match”, from (Norvig, 1991) provides a nice pattern matching facility within the Lisp environment, allowing for explicit templates with variables (that can bind subexpressions or sequences of them), and including ways to apply arbitrary tests to expressions and to match boolean combi-

nations of patterns. However, there is no provision for “vertical” pattern matching or subexpression replacement “on the fly”, which are features of TTT we have found useful. Also the notation for alternatives, along with exclusions, is more concise than in Norvig’s matcher, for instance not requiring explicit ORs. Like TTT, pat-match supports matching multi-level structures, but unlike TTT, the pattern operators are not composable.

Mathematica also allows for sophisticated pattern matching, including matching of sequences and trees. It also includes a term rewriting system that is also capable of rewriting ordered sequences. It provides functions to apply patterns to arbitrary subtrees of a tree until all matches have been found or some threshold count is reached, and it can return all possible ways of applying a set of rules to an expression. However, as in the case of Norvig’s matcher there is no provision for vertical patterns or on-the-fly transduction (Wolfram Research, Inc, 2010).

### 3 TTT

#### Pattern Matching

Patterns in TTT are hierarchically composed of sub-patterns. The simplest kind of pattern is an arbitrary, explicit list structure (tree) containing no match operators, and this will match only an identical list structure. Slightly more flexible patterns are enabled by the “underscore operators” `_!`, `_+`, `_?`, `_*`. These match any single tree, any non-empty sequence of trees, the empty sequence or a sequence of one tree, and any (empty or non-empty) sequence of trees respectively. These operators (as well as all others) can also be thought of as match variables, as they pick up the tree or sequence of trees they match as their binding.

The bindings are “non-sticky”, i.e., an operator such as `_!` will match any tree, causing replacement of any prior binding (within the same pattern) by that tree. However, bindings can be preserved in two ways: by use of new variable names, or by use of sticky variables. New variable names are obtained by appending additional characters – conventionally, digits – to the basic ones, e.g., `_!1`, `_!2`, etc. Sticky variables are written with a dot, i.e., `_!.`, `_+.`, `_?.`, `_*.`, where again these symbols may be followed by additional digits or other characters. The important point concerning sticky variables is that multiple occurrences of

such a variable in a pattern can only be bound by the same unique value. Transductions are specified by a special pattern operator `/` and will be described in the next section.

More flexible operators, allowing for alternatives, negation, and vertical patterns among other constructs, are written as a list headed by an operator without an underscore, followed by one or more arguments. For example, `(! A (B C))` will match either the symbol `A` or the list `(B C)`, i.e., the two arguments provide alternatives. As an example involving negation, `(+ A (B _!) ~ (B B))` will match any nonempty sequence whose elements are `As` or two-element lists headed by `B`, but disallowing elements of type `(B B)`. Successful matches cause the matched expression or sequence of expressions to become the value of the operator. Again, sticky versions of match operators use a dot, and the operators may be extended by appending digits or other characters.

The ten basic argument-taking pattern operators are:

- `!` Match exactly one sub-pattern argument.
- `+` Match a sequence of one or more arguments.
- `?` Match the empty sequence or one argument.
- `*` Match the empty sequence or one or more arguments.
- `{}` Match any permutation of the arguments.
- `<>` Match the sequence of arguments directly (without the parenthesis enclosing the `<>` operator)
- `^` Match a tree that has a child matching one of the arguments.
- `^*` Match a tree that has a descendant matching one of the arguments.
- `^@` Match a vertical path.
- `/` Attempt a transduction. (Explained later.)

Various examples will be provided below. Any of the arguments to a pattern operator may be composed of arbitrary patterns.

**Negation:** The operators `!`, `+`, `?`, `*`, and `^` support negation (pattern exclusion); i.e., the arguments of these operators may include not only alternatives, but also a negation sign `~` (after the

alternatives) that is immediately followed by one or more precluded patterns. If no alternatives are provided, only precluded patterns, this is interpreted as “anything goes”, except for the precluded patterns. For example,  $(+ \sim (A \ A) \ B)$  will match any nonempty sequence of expressions that contains no elements of type  $(A \ A)$  or  $B$ . Note that the negation operator does not appear by itself; one must instead specify it in conjunction with one of the other operators. The pattern  $(! \sim P)$  matches any single tree which does not match pattern  $P$ .

**Conjunction:** We have so far found no compelling need for an explicit conjunction operator. If necessary, a way to say that a tree must match each of two or more patterns is to use double negation. For example, suppose we want to say that an expression must begin with an  $A$  or  $B$  but must contain an  $A$  (at the top level); this could be expressed as

$(! \sim (! \sim ((! \ A \ B) \ _*) \ (_* \ A \ _*)))$ .

However, this would be more perspicuously expressed in terms of alternatives, i.e.,

$(! \ (A \ _*) \ (B \ _* \ A \ _*))$ .

We also note that the allowance for computable predicates (discussed below) enables introduction of a simple construct like

$(! \ (and? \ P1 \ P2))$ , where  $P1$  and  $P2$  are arbitrary TTT patterns, and  $and?$  is an executable predicate that applies the TTT matcher to its arguments and returns a non-nil value if both succeed and nil otherwise. In the former case, the binding of the outer  $!$  will become the matched tree.

**Bounded Iteration:** The operators  $!$ ,  $+$ ,  $?$ ,  $*$ , and  $\wedge$  also support bounded iteration, using square brackets. This enables one to write patterns that match exactly  $n$ , at least  $n$ , at most  $n$ , or from  $n$  to  $m$  times, where  $n$  and  $m$  are integers. Eg.  $(! \ [3] \ A)$  would match the sequence  $A \ A \ A$ . The vertical operator  $\wedge[n]$  matches trees with a depth- $n$  descendant that matches one of the operator’s arguments.

**Vertical Paths:** The operators  $\wedge*$  and  $\wedge@$  enable matching of vertical paths of arbitrary depth. The first, as indicated, requires the existence of a descendant of the specified type, while the second, with arguments such as  $(\wedge@ \ P1 \ P2 \ \dots \ Pn)$  matches a tree whose root matches  $P1$ , and has a child matching  $P2$ , which in turn has a child matching  $P3$ , and so on. Note that this basic form is indifferent to the point of attachment of each

successive offspring to its parent; but we can also specify a point of attachment in any of the  $P1$ ,  $P2$ , etc., by writing  $@$  for one of its children. Because this operator ( $@$ ) does not appear outside the vertical path context, it was not listed with the other operators above. Note as well that the argument sequence  $P1 \ P2 \ \dots$  can itself be specified as a pattern (e.g., via  $(+ \ \dots)$ ), and in this case there is no advance commitment to the depth of the tree being matched.

**Computable Predicates:** Arbitrary predicates can be used during the pattern matching process (and consequently the transduction process). Symbols with names ending in a question mark, and with associated function definitions, are interpreted as predicates. When a predicate is encountered during pattern matching, it is called with the current subtree as input. The result is nil or non-nil, and when nil is returned the current match fails, otherwise it succeeds (but the non-nil value is not used further). Additionally, supporting user-defined predicates enables the use of named patterns.

**Some Example Patterns:** Here are examples of particular patterns, with verbal explanations. Also see Table 1, at the top of the next page, for additional patterns with example bindings.

- $(! \ (+ \ A) \ (+ \ B))$   
Matches a non-empty sequence of  $A$ ’s or a non-empty sequence of  $B$ ’s, but not a sequence containing both.
- $(* \ (<> \ A \ A))$   
Matches an even number of  $A$ ’s.
- $(B \ (* \ (<> \ B \ B)))$   
Matches an odd number of  $B$ ’s.
- $((\{\} \ A \ B \ C))$   
Matches  $(A \ B \ C)$ ,  $(A \ C \ B)$ ,  $(B \ A \ C)$ ,  $(B \ C \ A)$ ,  $(C \ A \ B)$  and  $(C \ B \ A)$  and nothing else.
- $((<> \ A \ B \ C))$   
Matches  $(A \ B \ C)$  and nothing else.
- $(\wedge* \ X)$   
Matches any tree that has descendant  $X$ .
- $(\wedge@ \ (+ \ (@ \ _*)) \ X)$   
Matches any tree with leftmost leaf  $X$ .

| Pattern                                 | Tree                         | Bindings                                   |
|-----------------------------------------|------------------------------|--------------------------------------------|
| <code>_!</code>                         | <code>(A B C)</code>         | <code>(_! (A B C))</code>                  |
| <code>(_* F)</code>                     | <code>(A B (C D E) F)</code> | <code>(_* A B (C D E))</code>              |
| <code>(A B _? F)</code>                 | <code>(A B (C D E) F)</code> | <code>(_? (C D E))</code>                  |
| <code>(A B _? (C D E) F)</code>         | <code>(A B (C D E) F)</code> | <code>(_?)</code>                          |
| <code>(^@ _! (C _*) E)</code>           | <code>(A B (C D E) F)</code> | <code>(^@ (A B (C D E) F)) (_* D E)</code> |
| <code>(A B (&lt;&gt; (C D E)) F)</code> | <code>(A B (C D E) F)</code> | <code>(&lt;&gt; (C D E))</code>            |
| <code>(A B (&lt;&gt; C D E) F)</code>   | <code>(A B (C D E) F)</code> | <code>nil</code>                           |

Table 1: Binding Examples

## Transductions

Transductions are specified with the transduction operator, `/`, which takes two arguments. The left argument may be any tree pattern and the right argument may be constructed of literals, variables from the lhs pattern, and function calls.

Transductions may be applied to the roots of trees or arbitrary subtrees, and they may be restricted to apply at most once, or until convergence. When applying transductions to arbitrary subtrees, trees are searched top-down, left to right. When a match to the transduction lhs pattern occurs, the resulting bindings and transduction rhs are used to create a new tree, which then replaces the tree (or subtree) that matched the lhs.

Here are a few examples of simple template to template transductions:

- `(/ X Y)`  
Replaces the symbol `X` with the symbol `Y`.
- `(/ (! X Y Z) (A))`  
Replaces any `X`, `Y`, or `Z` with `A`.
- `(/ (! X) (! !))`  
Duplicates an `X`.
- `(/ (X _* Y) (X Y))`  
Remove all subtrees between `X` and `Y`.
- `(/ (_! _* _!1) (_!1 _* _!))`  
Swaps the subtrees on the boundaries.

A transduction operator may appear nested within a composite pattern. The enclosing pattern effectively restricts the context in which the transduction will be applied, because only a match to the entire pattern will trigger a transduction. In this case, the transduction is applied at the location in the tree where it matches. The rhs of such a transduction is allowed to reference the

bindings of variables that appear in the enclosing pattern. We call these local transductions, as distinct from replacement of entire trees. Local transductions are especially advantageous when performing vertical path operations, allowing for very concise specifications of local changes. For example, the transduction

```
(^@ (* ((! S SBAR) _+))
  (/ (WH _!))
  (REL-WH (WH _!)))
```

wraps `(REL-WH ...)` around a `(WH ...)` constituent occurring as a descendant of a vertical succession of clausal (`S` or `SBAR`) constituents. Applied to the tree `(S (SBAR (WH X) B) A)`, this yields the new tree `(S (SBAR (REL-WH (WH X)) B) A)`. Additional examples appear later (especially in the parse tree refinement section).

TTT also supports constructive functions, with bound variables as arguments, in the rhs templates, such as `join-with-dash!`, which concatenates all the bound symbols with intervening dashes, and `subst-new!`, which will be discussed later. One can imagine additional functions, such as `reverse!`, `l-shift!`, `r-shift!`, or any other function of a list of terms that may be useful to the application at hand. Symbols with names ending in the exclamation mark are assumed to be associated with function definitions, and when appearing as the first element of a list are executed during output template construction. To avoid writing many near-redundant functions, we use the simple function `apply!` to apply arbitrary Lisp functions during template construction.

## Theoretical Properties

A thorough treatment of the formal properties of tree transducers is (Comon, 2007). A good

overview of the dimensions of variability among formal tree transducers is given in (Knight, 2007). The main properties are restrictions on the height of the tree fragments allowed in rules, linearity, and whether the rules can delete arbitrary subtrees. Among the more popular and recent ones, synchronous tree substitution grammars (STSG), synchronous tree sequence substitution grammars (STSSG), and multi bottom-up tree transducers (MBOT) constrain their rules to be linear and non-deleting, which is important for efficient rule learning and transduction execution (Chiang, 2004; Galley et. al, 2004; Yamada and Knight, 2001; Zhang et. al, 2008; Maletti, 2010).

The language TTT does not have any such restrictions, as it is intended as a general programming aid, with a concise syntax for potentially radical transformations, rather than a model of particular classes of linguistic operations. Thus, for example, the 5-element pattern `(! ((* A) B) ((* A) C) ((* A) D) ((* A) E) ((* A)))` applied to the expression `(A A A A A)` rescans the latter 5 times, implying quadratic complexity. (Our current implementation does not attempt regular expression reduction for efficient recognition.) With the addition of the permutation operator `{}`, we can force all permutations of certain patterns to be tried in an unsuccessful match (e.g., `( { { } } (! A B C) (! A B C) (! A B C) )`) applied to `(C B E)`, leading to exponential complexity. (Again, our current implementation does not attempt to optimize.) Also, allowance for repeated application of a set of rules to a tree, until no further applications are possible, leads to Turing equivalence. This of course is true even if only the 4 underscore-operators are allowed: We can simulate the successive transformations of the configurations of a Turing machine with string rewriting rules, which are easily expressed in terms of those operators and `/`. Additionally, pattern predicates and function application in the right-hand sides of rules are features present in TTT that are not included in the above formal models. In themselves (even without iterative rule application), these unrestricted predicates and functions lead to Turing equivalence.

The set of pattern matching operators was chosen so that a number of disparate pattern matching programs could all be replaced with concise TTT rules. It does subsume regular tree expres-

sions and can therefore be used to match any regular tree language. Specifically, alternation can be expressed with `!` and (vertical) iteration with `^@` and `*`. The example expression from (Comon, 2007) can be specified as `(^@ (* (cons 0 @)) nil)`, which matches Lisp expressions corresponding to lists of zero or more zeros. TTT also differs from standard tree automata by lack of an explicit state.

**Nondeterminism and noncommutativity:** In general, given a set of transductions (or even a single transduction) and an input tree there may be several ways to apply the transductions, resulting in different trees. This phenomenon comes from three sources:

- Rule application order - transductions are not in general commutative.
- Bindings - a pattern may have many sets of consistent bindings to a tree (e.g., pattern `(_* _*1)` can be bound to the tree `(X Y Z)` in four distinct ways).
- Subtree search order - a single transduction may be applicable to a tree in multiple locations (e.g., `(/ _! X)` could replace any node of a tree, including the root, with a single symbol).

Therefore some trees may have many reduced forms with respect to a set of transductions (where by reduced we mean a tree to which no transductions are applicable) and even more reachable forms.

Our current implementation does not attempt to enumerate possible transductions. Rather, for a given tree and a list of transductions, each transduction (in the order given) is applied in top-down fashion at each feasible location (matching the lhs), always using the first binding that results from this depth-first, left-to-right (i.e., pre-order) search. Our assumption is that the typical user has a clear sense of the order in which transformations are to be performed, and is working with rules that do not interact in unexpected ways. For example, consider the cases of PP misattachment mentioned earlier. In most cases, such misattachments are disjoint (e.g., consider a caption reading “John and Mary in front and David and Sue in the back”, where both PPs may well have been attached to the proper noun immediately to the left, instead

of to the appropriate conjunction). It is also possible for one rule application to change the context of another, but this is not necessarily problematic. For instance, suppose that in the sentence “John drove the speaker to the airport in a hurry” the PP “to the airport” has been misattached to the NP for “the speaker” and that the PP “in a hurry” has been misattached to the NP for “the airport”. Suppose further that we have a repair rule that carries a PP attached to an NP upward in the parse tree until it reaches a VP node, reattaching the PP as a child of that VP. (The repair rule might incorporate a computable predicate that detects a poor fit between an NP and a PP that modifies it.) Then the result will be the same regardless of the order in which the two repairs are carried out. The difference is just that with a preorder discipline, the second PP (“in a hurry”) will move upward by one step less than if the order is reversed, because the first rule application will have shortened the path to the dominating VP by one step.

In the future it may be worthwhile to implement exhaustive exploration of all possible matches and expression rewrites, as has been done in Mathematica. In general this would call for lazy computation, since the set of rewrites may be an infinite set.

## 4 Some linguistic examples

**Parse Tree Refinement:** First, here is a simple transduction to delete empty brackets, which sometimes occur in the Brown corpus: (/ ( \_\* ( ) \_\*1 ) ( \_\* \_\*1 ) ).

To distinguish between past and passive participles, we want to search for the verb *have*, and change the participle token correspondingly, as discussed earlier. The next two transductions are equivalent – the first is global and the second is an example of a local or on-the-fly transduction. For simplicity we consider only the *has* form of *have*. Observe the more concise form, and simpler variable specifications of the second transduction.

```
(/ (VP _* (VBZ HAS) _*1 (VBN _) _*2)
   (VP _* (VBZ HAS) _*1 (VBEN _) _*2))
(VP _* (VBZ HAS) _* ((/ VBN VBEN) _) _*)
```

To distinguish temporal and non-temporal nominals, we use a computable predicate to detect temporal nouns, and then annotate the NP tag accordingly. (One more time, we show global and local variants.)

```
(/ (NP _* nn-temporal?)
   (NP-TIME _* nn-temporal?))
((/ NP NP-TIME) _* nn-temporal?)
```

Assimilation of verb particles into single constituents is useful to semantic interpretation, and is accomplished with the transduction:

```
(/ (VP (VB _) _!1)
   (\{\} (PRT (RP _!2)) (NP _*1)))
(VP (VB _!1 _!2) (NP _*1)))
```

We often particularize PPs to show the preposition involved, e.g., PP-OF, PP-FROM, etc. Note that this transduction uses the `join-with-dash!` function, which enables us to avoid writing a separate transduction for each preposition:

```
(/ (PP (IN _) _*1)
   ((join-with-dash! PP _)
    (IN _) _*1))
```

Such a rule transforms subtrees such as (PP (IN FROM)) by rewriting the PP tag as (PP-FROM (IN FROM)).

As a final syntactic processing example (transitioning to discourse phenomena and semantics), we illustrate the use of TTT in establishing potential coreferents licensed by C-command relations, for the sentence mentioned earlier. We assume that for reference purposes, NP nodes are decorated with a SEM-INDEX feature (with an integer value), and pronominal NPs are in addition decorated with a CANDIDATE-COREF feature, whose value is a list of indices (initially empty). Thus we have the following parse structure for the sentence at issue (where for understandability of the relatively complex parse tree we depart from Treebank conventions not only in the use of some explicit features but also in using linguistically more conventional phrasal and part-of-speech category names; R stands for relative clause):

```
(S ((NP SEM-INDEX 1) (NAME John))
   (VP (V shows)
        ((NP SEM-INDEX 2) (NAME Lillian))
        ((NP SEM-INDEX 3) (DET the)
         (N (N snowman)
            (R (RELPRON that)
                ((S GAP NP)
                 ((NP SEM-INDEX 4
                    CANDIDATE-COREF ())
                 (PRON he))
                ((VP GAP NP) (V built)
                 ((NP SEM-INDEX 4)
                  (PRON *trace*))))))))))
```

Here is a TTT rule that adjoins the index of a C-commanding NP node to the CANDIDATE-COREF list of a C-commanded pronominal NP:

```
(_* ((NP _* SEM-INDEX _!. _*) _+) _*)
```

```
(^* ((NP _* CANDIDATE-COREF
(/ _!(adjoin! _!. _!)) _*) (PRON _!))) _*)
```

The NP on the first line is the C-commanding NP, and note that we are using a sticky variable ‘\_!.’ for its index, since we need to use it later. (None of the other match variables need to be sticky, and we reuse ‘\_!’ and ‘\_!’ multiple times.) The key to understanding the rule is the constituent headed by ‘^\*’, which triggers a search for a (right) sibling or descendant of a sibling of the NP node that reaches an NP consisting of a pronoun, and thus bearing the CANDIDATE-COREF feature. This feature is replaced “on the fly” by adjoining the index of the C-commanding node (the value of ‘\_!.’) to it. For the sample tree, the result is the following (note the value ‘(1)’ of the CANDIDATE-COREF list):

```
(S ((NP SEM-INDEX 1) (NAME John))
  (VP (V shows)
    ((NP SEM-INDEX 2) (NAME Lillian))
    ((NP SEM-INDEX 3) (DET the)
      (N (N snowman)
        (R (RELPRON that)
          ((S GAP NP)
            ((NP SEM-INDEX 4)
              CANDIDATE-COREF (1))
              (PRON he))
            ((VP GAP NP) (V built)
              ((NP SEM-INDEX 4)
                (PRON *trace*))))))))))
```

Of course, this does not yet incorporate number and gender checks, but while these could be included, it is preferable to gather candidates and heuristically pare them down later. Thus repeated application of the rule would also add the index 2 (for *Lillian*) to CANDIDATE-COREF.

## Working with Logical Forms

**Skolemization:** Skolemization of an existential formula of type  $(\text{some } x \text{ } R \text{ } S)$ , where  $x$  is a variable,  $R$  is a restrictor formula and  $S$  is the nuclear scope, is performed via the transduction

```
(/ (some _! _!1 _!2)
  (subst-new! _! (_!1 and.cc _!2))).
```

The function `subst-new!` replaces all occurrences of a free variable symbol in an expression with a new one. (We assume that no variable occurs both bound and free in the same expression.) It uses a TTT transduction to accomplish this. For example,  $(\text{some } x \text{ } (x \text{ politician.n}) \text{ } (x \text{ honest.a}))$  becomes  $((\text{C1.skol politician.n}) \text{ } \text{and.cc} \text{ } (\text{C1.skol honest.a}))$ .

**Inference:** We can use the following rule to accomplish simple default inferences such as that if

most things with property  $P$  have property  $Q$ , and most things with property  $Q$  have property  $R$ , then (in the absence of knowledge to the contrary) many things with property  $P$  also have property  $R$ . (Our logical forms use infix syntax for predication, i.e., the predicate follows the “subject” argument. Predicates can be lambda abstracts, and the computable boolean function `pred?` checks for arbitrary predicative constructs.)

```
(/
  (_* (most _!.1
    (_!.1 (!.p pred?))
    (_!.1 (!.q pred?)))
  _* (most _!.2
    (_!.2 !.q)
    (_!.2 (!.r pred?))) _*)
  (many _!.1 (_!.1 !.p) (_!.1 !.r)))
```

For example,  $((\text{most } x \text{ } (x \text{ dog.n}) \text{ } (x \text{ pet.n})) (\text{most } y \text{ } (y \text{ pet.n}) \text{ } (x \text{ friendly.a})))$  yields the default inference  $(\text{many } (x \text{ dog.n}) \text{ } (x \text{ friendly.a}))$ .

The assumption here is that the two *most*-formulas are embedded in a list of formulas (selected by the inference algorithm), and the three occurrences of `_*` allow for miscellaneous surrounding formulas. (To allow for arbitrary ordering of formulas in the working set, we also provide a variant with the two *most*-formulas in reverse order.) Inference with tree transduction rules has also been performed by (Koller and Stefan, 2010).

**Predicate Disambiguation:** The following rules are applicable to patterns of predication such as  $((\text{det dog.n have.v } (\text{det tail.n}))$ ,  $((\text{det bird.n have.v } (\text{det nest.n}))$ , and  $((\text{det man.n have.v } (\text{det accident.n}))$ . (Think of `det` as an unspecified, unscoped quantifier.) The rules simultaneously introduce plausible patterns of quantification and plausible disambiguations of the various senses of `have.v` (e.g., have as part, possess, eat, experience):

```
(/ ((det (! animal?)) have.v
  (det (!1 animal-part?)))
  (all-or-most x (x !))
  (some e ((pair x e) enduring)
    (some y (y !1)
      ((x have-as-part.v y) ** e))))

(/ ((det (! agent?)) have.v
  (det (!1 possession?)))
  (many x (x !))
  (some e
    (some y (y !1)
      (x possess.v y) ** e))))
```



```

(/ ((det (! animal?)) have.v
  (det (! food?)))
  (many x (x !))
  (occasional e
    (some y (y !1)
      (x eat.v y) ** e))))

(/ ((det (! person?)) have.v
  (det (! event?)))
  (many x (x !))
  (occasional e
    (some y (y !1)
      ((x experience.v y) ** e))))

```

Computable predicates such as `animal?` and `event?` are evaluated with the help of WordNet and other resources. Details of the logical form need not concern us, but it should be noted that the ‘`**`’ connects sentences to events they characterize much as in various other theories of events and situations.

Thus, for example, `((det dog.n have.v (det tail.n))` is mapped to:

```

(all-or-most x (x dog.n
  (some e ((pair x e) enduring)
    (some y (y tail.n)
      ((x have-as-part.v y) ** e)))))

```

This expresses that for all or most dogs, the dog has an enduring attribute (formalized as an agent-event pair) of having a tail as a part.

**Logical Interpretation:** The following transductions directly map some simple parse trees to logical forms. The rules, applied as often as possible to a parse tree, replace all syntactic constructs, recognizable from (Treebank-style) phrase headers like (JJ ...), (NP ...), (VP ...), (S ...), etc., by corresponding semantic constructs. For example, “The dog bit John Doe”, parsed as

```

(S (NP (DT the) (NN dog))
  (VP (VBD bit)
    (NP (NNP John) (NNP Doe))))

```

yields `(the x (x dog.n) (x bit.v John.Doe.name))`.

Type-extensions such as ‘.a’, ‘.n’, and ‘.v’ indicate adjectival, nominal, and verbal predicates, and the extension ‘.name’ indicates an individual constant (name); these are added by the functions `make-adj!`, `make-noun!`, and so on. The fourth rule below combines two successive proper nouns (NNPs) into one. We omit event variables, tense and other refinements.

```

(/ (JJ _) (make-adj! _))
(/ (NN _) (make-noun! _))
(/ (VBD _) (make-verb! _))

```

```

(/ (_*.a (NNP _!.1) (NNP _!.2) _*.b)
  (_*.a (NNP _!.1 _!.2) _*.b))
(/ (NNP _) (make-name! (_+)))
(/ (NP _) _)
(/ (S (NP (DT the) _) (VP _+))
  (the x (x _) (x _+)))

```

These rules are illustrative only, and are not fully compositional, as they interpret an NP with a determiner only in the context of a sentential subject, and a VP only in the context of a sentential predicate. Also, by scoping the variable of quantification, they do too much work at once. A more general approach would use compositional rules such as `(/ (S (!1 NP?) (!2 VP?)) ((sem! !1) (sem! !2)))`, where the `sem!` function again makes use of TTT, recursively unwinding the semantics, with rules like the first five above providing lexical-level `sem!`-values.

We have also experimented with rendering logical forms back into English, which is rather easier, mainly requiring dropping of variables and brackets and some reshuffling of constituents.

## 5 Conclusion

The TTT language is well-suited to the applications it was aimed at, and is already proving useful in current syntactic/semantic applications. It provides a very concise, transparent way of specifying transformations that previously required extensive symbolic processing. Some remaining issues are efficient access to, and deployment of, rules that are locally relevant to a transduction; and heuristics for executing matches and transductions more efficiently (e.g., recognizing various cases where a complex rule cannot possibly match a given tree, because the tree lacks some constituents called for by the rule; or use of efficient methods for matching regular-expression subpatterns).

The language also holds promise for rule-learning, thanks to its simple template-to-template basic syntax. The kinds of learning envisioned are learning parse-tree repair rules, and perhaps also LF repair rules and LF-to-English rules.

## Acknowledgments

The work was supported by ONR-STTR award N00014-11-10417, and NSF grants IIS-1016735, NSF IIS-0916599, and NSF IIS-0910611.

## References

- Eugene Charniak and Mark Johnson. 2005. Coarse-to-Fine n-Best Parsing and MaxEnt Discriminative Reranking. *ACL 2005*, 173–180. Association for Computational Linguistics, Ann Arbor, MI, USA.
- David Chiang. 2004. Evaluation of Grammar Formalisms for Applications to Natural Language Processing and Biological Sequence Analysis. Phd. Thesis. University of Pennsylvania.
- H. Comon and M. Dauchet and R. Gilleron and C. Löding and F. Jacquemard and D. Lugiez and S. Tison and M. Tommasi. 2007. Tree Automata Techniques and Applications Available on: <http://www.grappa.univ-lille3.fr/tata>
- Michel Galley and Mark Hopkins and Kevin Knight and Daniel Marcu. 2004. What’s in a Translation Rule?. *NAACL 2004*, 273–280. Boston, MA, USA.
- Thomas Genet and Valerie View Triem Tong. 2003. Timbuk: A Tree Automata Library <http://www.irisa.fr/celtique/genet/timbuk/>
- Ralph Griswold. 1971. *The SNOBOL Programming Language*. Prentice-Hall, Inc. Upper Saddle River, NJ, USA.
- Paul Hudak, John Peterson, and Joseph Fasel. 2000. A Gentle Introduction To Haskell: Version 98. Los Alamos National Laboratory. <http://www.haskell.org/tutorial/patterns.html>.
- Alexander Koller and Stefan Thater. 2010. Computing weakest readings. *ACL 2010*. 30–39. Stroudsburg, PA, USA.
- Kevin Knight. 2007. Capturing practical natural language transformations. *Machine Translation*, Vol 21, Issue 2, 121–133. Kluwer Academic Publishers. Hingham, MA, USA.
- Roger Levy and Galen Andrew. 2006. Tregex and Tsurgeon: tools for querying and manipulating tree data structures. *Language Resources Evaluation Conference (LREC ’06)*.
- Andreas Maletti. 2010. Why synchronous tree substitution grammars?. *HLT 2010*. Association for Computational Linguistics, Stroudsburg, PA, USA.
- Jonathan May and Kevin Knight. 2008. A Primer on Tree Automata Software for Natural Language Processing. <http://www.isi.edu/licensed-sw/tiburon/>
- Peter Norvig. 1991. *Paradigms of Artificial Intelligence Programming* Morgan Kaufmann. Waltham, MA, USA.
- Don Rozenberg. 2002. SnoPy - Snobol Pattern Matching Extension for Python. <http://snopy.sourceforge.net/user-guide.html>.
- Wolfram Research, Inc. 2010. *Wolfram Mathematica 8 Documentation*. Champagne, IL, USA. <http://reference.wolfram.com/mathematica/guide/RulesAndPatterns.html>.
- World Wide Web Consortium. 1999. XML Path Language (XPath) <http://www.w3.org/TR/xpath/>
1999. XSL Transformations (XSLT) <http://www.w3.org/TR/xslt>
- Kenji Yamada and Kevin Knight. 2001. A Syntax-Based Statistical Translation Model. *ACL 2001*, 523–530. Stroudsburg, PA, USA.
- Min Zhang and Hongfei Jiang and Aiti Aw and Haizhou Li and Chew Lim Tan and Sheng Li. 2008. A tree sequence alignment-based tree-to-tree translation model. *ACL 2008*.
